# Supplementary material for: Computed Tomography-Based Radiomics for Long-Term Prognostication of High-Risk Localized Prostate Cancer Patients Received Whole Pelvic Radiotherapy
Source: MDPI journal article supplement (doi:10.3390/jpm13121643), 2023-11-24
Supplement: s1 [file s1]

## Supplementary Materials

**Table S1.** Definitions of clinical target volumes (CTVs) and planning target volumes (PTVs).

| Organ       | Target                  | Definition                                                                                                                                                                     |
|-------------|-------------------------|--------------------------------------------------------------------------------------------------------------------------------------------------------------------------------|
| Prostate    | CTV <sub>prostate</sub> | Included the entire prostate gland for all patients with the addition of proximal two-thirds of seminal vesicles for patients with intermediate- or high-risk prostate cancer. |
|             | PTV <sub>prostate</sub> | An anisotropic expansion of CTV <sub>prostate</sub> with a 6-mm margin posteriorly and 1-cm margin in all other directions.                                                    |
| Lymph nodes | CTV <sub>LN</sub>       | Included the distal common iliac lymphatics, external iliac lymphatics, internal iliac lymphatics, presacral lymphatics and obturator lymphatics.                              |
|             | PTV <sub>LN</sub>       | An isotropic expansion of CTV <sub>LN</sub> with a 5-mm margin.                                                                                                                |

**Table S2.** Acceptance criteria and organs at risk constraints.

| Volume        | Acceptance criteria or constraints                                                                                                                           |
|---------------|--------------------------------------------------------------------------------------------------------------------------------------------------------------|
| PTV           | Dose <sub>minimum</sub> ≥ 95% of prescribed dose<br>≤ 3% received > 107% of prescribed dose<br>≤ 3% received < 93% of prescribed dose                        |
| Rectum        | Volume <sub>75Gy</sub> ≤ 15%<br>Volume <sub>70Gy</sub> ≤ 20%<br>Volume <sub>65Gy</sub> ≤ 25%<br>Volume <sub>60Gy</sub> ≤ 35%<br>Volume <sub>50Gy</sub> ≤ 50% |
| Bladder       | Volume <sub>80Gy</sub> ≤ 15%<br>Volume <sub>75Gy</sub> ≤ 25%<br>Volume <sub>70Gy</sub> ≤ 35%<br>Volume <sub>65Gy</sub> ≤ 50%                                 |
| Femoral head  | Volume <sub>50Gy</sub> ≤ 50%                                                                                                                                 |
| Bowel space   | Volume <sub>45Gy</sub> ≤ 200 cc                                                                                                                              |
| Penile bulb   | Dose <sub>70%</sub> ≤ 70 Gy<br>Dose <sub>90%</sub> ≤ 50 Gy                                                                                                   |
| Normal tissue | Dose <sub>maximum</sub> ≤ 110% of prescribed dose                                                                                                            |

**Table S3.** Number of extracted radiomic features.

| Extracted radiomic features (n=651) |           |             |            |            |           |            |           |
|-------------------------------------|-----------|-------------|------------|------------|-----------|------------|-----------|
|                                     | Shape     | First-order | Texture    |            |           |            |           |
|                                     |           |             | GLCM       | GLSZM      | NGTDM     | GLRLM      | GLDM      |
| Original                            | 14        | 18          | 0          | 0          | 0         | 0          | 0         |
| Discretized                         | 0         | 0           | 22         | 16         | 5         | 16         | 14        |
| LoG <sub>0.5mm</sub>                | 0         | 18          | 0          | 0          | 0         | 0          | 0         |
| LoG <sub>2mm</sub>                  | 0         | 18          | 0          | 0          | 0         | 0          | 0         |
| LoG <sub>3mm</sub>                  | 0         | 18          | 0          | 0          | 0         | 0          | 0         |
| LoG <sub>4mm</sub>                  | 0         | 18          | 0          | 0          | 0         | 0          | 0         |
| LoG <sub>4.5mm</sub>                | 0         | 18          | 0          | 0          | 0         | 0          | 0         |
| LoG <sub>5mm</sub>                  | 0         | 18          | 0          | 0          | 0         | 0          | 0         |
| LoG <sub>0.5mm</sub> + Discretized  | 0         | 0           | 22         | 16         | 5         | 16         | 14        |
| LoG <sub>2mm</sub> + Discretized    | 0         | 0           | 22         | 16         | 5         | 16         | 14        |
| LoG <sub>3mm</sub> + Discretized    | 0         | 0           | 22         | 16         | 5         | 16         | 14        |
| LoG <sub>4mm</sub> + Discretized    | 0         | 0           | 22         | 16         | 5         | 16         | 14        |
| LoG <sub>4.5mm</sub> + Discretized  | 0         | 0           | 22         | 16         | 5         | 16         | 14        |
| LoG <sub>5mm</sub> + Discretized    | 0         | 0           | 22         | 16         | 5         | 16         | 14        |
| <b>Sub-total</b>                    | <b>14</b> | <b>126</b>  | <b>154</b> | <b>112</b> | <b>35</b> | <b>112</b> | <b>98</b> |

| Shape features (3-dimensional)                            |                                            | First-order features                          |                                         |
|-----------------------------------------------------------|--------------------------------------------|-----------------------------------------------|-----------------------------------------|
| 1. Mesh volume                                            | 8. Maximum 2D diameter (column)            | 1. Energy                                     | 10. Interquartile range                 |
| 2. Voxel volume                                           | 9. Maximum 2D diameter (row)               | 2. Total energy                               | 11. Range                               |
| 3. Surface area                                           | 10. Major axis length                      | 3. Entropy                                    | 12. Mean absolute deviation             |
| 4. Surface area to volume ratio                           | 11. Minor axis length                      | 4. Minimum                                    | 13. Robust mean absolute deviation      |
| 5. Sphericity                                             | 12. Least axis length                      | 5. 10th percentile                            | 14. Root mean squared                   |
| 6. Maximum 3D diameter                                    | 13. Elongation                             | 6. 90th percentile                            | 15. Skewness                            |
| 7. Maximum 2D diameter (slice)                            | 14. Flatness                               | 7. Maximum                                    | 16. Kurtosis                            |
|                                                           |                                            | 8. Mean                                       | 17. Variance                            |
|                                                           |                                            | 9. Median                                     | 18. Uniformity                          |
| Gray level co-occurrence matrix (GLCM) features           |                                            | Gray level size zone matrix (GLSZM) features  |                                         |
| 1. Auto correction                                        | 12. Joint entropy                          | 1. Small area emphasis                        | 9. Zone variance                        |
| 2. Joint average                                          | 13. Informational measure of correlation 1 | 2. Large area emphasis                        | 10. Zone entropy                        |
| 3. Cluster prominence                                     | 14. Informational measure of correlation 2 | 3. Gray level non-uniformity                  | 11. Low gray level zone emphasis        |
| 4. Cluster shade                                          | 15. Inverse difference moment              | 4. Gray level non-uniformity normalized       | 12. High gray level zone emphasis       |
| 5. Cluster tendency                                       | 16. Inverse difference moment normalized   | 5. Size-zone non-uniformity                   | 13. Small area low gray level emphasis  |
| 6. Contrast                                               | 17. Inverse difference                     | 6. Size-zone non-uniformity normalized        | 14. Small area high gray level emphasis |
| 7. Correlation                                            | 18. Inverse difference normalized          | 7. Zone percentage                            | 15. Large area low gray level emphasis  |
| 8. Difference average                                     | 19. Inverse variance                       | 8. Gray level variance                        | 16. Large area high gray level emphasis |
| 9. Difference entropy                                     | 20. Maximum probability                    | Gray level run length matrix (GLRLM) features |                                         |
| 10. Difference variance                                   | 21. Sum squares                            | 1. Short run emphasis                         | 9. Run variance                         |
| 11. Joint energy                                          | 22. Sum entropy                            | 2. Long run emphasis                          | 10. Run entropy                         |
| Neighbouring gray tone difference matrix (NGTDM) features |                                            | 3. Gray level non-uniformity                  | 11. Low gray level run emphasis         |
| 1. Coarseness                                             |                                            | 4. Gray level non-uniformity normalized       | 12. High gray level run emphasis        |
| 2. Contrast                                               |                                            | 5. Run length non-uniformity                  | 13. Short run low gray level emphasis   |
| 3. Busyness                                               |                                            | 6. Run length non-uniformity normalized       | 14. Short run high gray level emphasis  |
| 4. Complexity                                             |                                            | 7. Run percentage                             | 15. Long run low gray level emphasis    |
| 5. Strength                                               |                                            | 8. Gray level variance                        | 16. Long run high gray level emphasis   |
| Gray level dependence matrix (GLDM) features              |                                            |                                               |                                         |
| 1. Small dependence emphasis                              | 6. Gray level variance                     | 11. Small dependence low gray level emphasis  |                                         |
| 2. Large dependence emphasis                              | 7. Dependence variance                     | 12. Small dependence high gray level emphasis |                                         |
| 3. Gray level non-uniformity                              | 8. Dependence entropy                      | 13. Large dependence low gray level emphasis  |                                         |
| 4. Dependence non-uniformity                              | 9. Low gray level emphasis                 | 14. Large dependence high gray level emphasis |                                         |
| 5. Dependence non-uniformity normalized                   | 10. High gray level emphasis               |                                               |                                         |

**Figure S1.** Shape features, first-order features and texture features extracted from the  $CTV_{prostate}$ . Texture features include grey level co-occurrence matrix (GLCM) features, grey level size zone matrix (GLSZM) features, neighbouring grey tone difference matrix (NGTDM) features, grey level run length matrix (GLRLM) features and grey level dependence matrix (GLDM) features.
